# Supplementary material for: Lung cancer incidence among workers biologically monitored for occupational exposure to lead: a cohort study
Source: PubMed Central journal article supplement (PMC10539111; doi:10.5271/sjweh.4046), 2022-10-01
Supplement: SJWEH-48-540-S001.pdf [file SJWEH-48-540-S001.pdf]

## Lung cancer incidence among workers biologically monitored for occupational exposure to lead: a cohort study <sup>1</sup>

by Ahti Anttila, PhD,<sup>2</sup> Sanni Uuksulainen, MSc, Matti Rantanen, MSc, Markku Sallmén, PhD

1. Supplementary material
2. Correspondence to: Ahti Anttila, Finnish Cancer Registry, Unioninkatu 22, 00130 Helsinki, Finland. [E-mail: ahti.anttila@cancer.fi]

**Supplementary table S1.** Definitions of FINJEM agents (unit of level, definition of unit and assessment threshold) used as occupational confounders.

| FINJEM agent                     | Unit of level      | Definition of unit                                                                                                       | Assessment threshold                                                                                                                                                       |
|----------------------------------|--------------------|--------------------------------------------------------------------------------------------------------------------------|----------------------------------------------------------------------------------------------------------------------------------------------------------------------------|
| Asbestos                         | f/ cm <sup>3</sup> | Fibers (length over 5µm, diameter below 3µm, aspect ratio at least 3:1) of asbestos in cubic centimeter of workroom air. | Possibly at least 5% of the occupation exposed to an annual mean level of 0.01 f/cm <sup>3</sup> of the agent at any time in 1945-95.                                      |
| Chromium                         | µg/m <sup>3</sup>  | Microgram of agent in cubic meter of workroom air.                                                                       | Possibly at least 5% of the occupation exposed to an annual mean level of 0.5 µg/m <sup>3</sup> of the agent at any time in 1945-95.                                       |
| Nickel                           | µg/m <sup>3</sup>  | Microgram of agent in cubic meter of workroom air.                                                                       | Possibly at least 5% of the occupation exposed to an annual mean level of 1 µg/m <sup>3</sup> of the agent at any time in 1945-95.                                         |
| Arsenic                          | µg/m <sup>3</sup>  | Microgram of agent in cubic meter of workroom air.                                                                       | Possibly at least 5% of the occupation exposed to an annual mean level of 0.5 µg/m <sup>3</sup> of the agent at any time in 1945-95.                                       |
| Cadmium                          | µg/m <sup>3</sup>  | Microgram of agent in cubic meter of workroom air                                                                        | Possibly at least 5% of the occupation exposed to an annual mean level of 0.5 µg/m <sup>3</sup> of the agent at any time in 1945-95.                                       |
| Quartz dust                      | mg/m <sup>3</sup>  | Milligram of agent in cubic meter of workroom air.                                                                       | Possibly at least 5% of the occupation exposed to an annual mean level of 0.02 mg/m <sup>3</sup> of the agent at any time in 1945-95.                                      |
| Respirable dust                  | mg/ m <sup>3</sup> | Milligram of agent in cubic meter of workroom air.                                                                       | Possibly at least 5% of the occupation exposed to an annual mean level of 0.02 mg/m <sup>3</sup> of the agent at any time in 1945-95.                                      |
| Gasoline engine exhaust          | mg/m <sup>3</sup>  | Milligrams of carbon monoxide in cubic meter of workroom air.                                                            | Possibly at least 5% of persons in the occupation exposed at work to an annual mean level of at least 2 mg/ m <sup>3</sup> of carbon monoxide at some time in 1945-95.     |
| Diesel engine exhaust            | mg/m <sup>3</sup>  | Milligrams of nitrogen dioxide in cubic meter of workroom air.                                                           | Possibly at least 5% of persons in the occupation exposed at work to an annual mean level of at least 0.05 mg/ m <sup>3</sup> of nitrogen dioxide at some time in 1945-95. |
| Polycyclic aromatic hydrocarbons | µg/m <sup>3</sup>  | Microgram of all PAH-compounds in cubic meter of workroom air.                                                           | Possibly at least 5% of the occupation exposed to an annual mean level of 0.1 µg/m <sup>3</sup> of the agent at any time in 1945-95.                                       |
| Benzo(a)pyrene                   | µg/m <sup>3</sup>  | Microgram of benzo(a)pyrene in cubic meter of workroom air.                                                              | Possibly at least 5% of the occupation exposed to an annual mean level of 0.005 µg/m <sup>3</sup> of the agent at any time in 1945-95.                                     |

**Supplementary table S2.** Internal analyses by the studied potential confounding occupational exposures, without and with the grouped mean personal blood lead level. For blood lead level, results only for the highest category (2.0+  $\mu\text{mol/L}$ ) is shown in the table in the right, compared with the lowest BL group. Cox regression, hazard ratios (HR) with 95% confidence intervals (CI) adjusted for age, gender, year of the last measurement and socio-economic status in 1975. Each of the potential occupational confounder was fitted in a set of separate models.

|                                                                                |         | Lead and daily smoking prevalence not included in the model | Lead and daily smoking prevalence included in the model |           |                                              |                  |
|--------------------------------------------------------------------------------|---------|-------------------------------------------------------------|---------------------------------------------------------|-----------|----------------------------------------------|------------------|
|                                                                                |         | Studied potential confounder                                | Studied potential confounder                            |           | Mean blood lead level 2.0+ $\mu\text{mol/l}$ |                  |
| Studied potential counfounder, unit and exposure category                      | N cases | HR and trend test                                           | HR and trend test                                       | CI        | HR                                           | CI               |
| <b>Asbestos ((f/cm<sup>3</sup>)*year)</b>                                      |         |                                                             |                                                         |           |                                              |                  |
| [0,0.001)                                                                      | 235     | 1.00                                                        | 1.00                                                    |           |                                              |                  |
| [0.001,2)                                                                      | 328     | 0.95                                                        | 0.91                                                    | 0.77-1.09 |                                              |                  |
| [2,Inf)                                                                        | 124     | 1.23                                                        | 1.15                                                    | 0.91-1.45 |                                              |                  |
| Continuous ( <i>P for trend</i> )                                              |         | <b>0.03</b>                                                 | <i>0.09</i>                                             |           |                                              |                  |
|                                                                                |         |                                                             |                                                         |           | <b>2.58</b>                                  | <b>1.85-3.59</b> |
| <b>Chromium and its compounds ((<math>\mu\text{g}/\text{m}^3</math>)*year)</b> |         |                                                             |                                                         |           |                                              |                  |
| [0,0.001)                                                                      | 242     | 1.00                                                        | 1.00                                                    |           |                                              |                  |
| [0.001,100)                                                                    | 404     | 1.14                                                        | 1.05                                                    | 0.88-1.24 |                                              |                  |
| [100,Inf)                                                                      | 41      | 1.10                                                        | 0.90                                                    | 0.63-1.28 |                                              |                  |
| Continuous ( <i>P for trend</i> )                                              |         | <i>0.42</i>                                                 | <i>0.55</i>                                             |           |                                              |                  |
|                                                                                |         |                                                             |                                                         |           | <b>2.60</b>                                  | <b>1.86-3.62</b> |
| <b>Nickel ((<math>\mu\text{g}/\text{m}^3</math>)*year)</b>                     |         |                                                             |                                                         |           |                                              |                  |
| [0,0.001)                                                                      | 305     | 1.00                                                        | 1.00                                                    |           |                                              |                  |
| [0.001,40)                                                                     | 300     | 1.18                                                        | 1.09                                                    | 0.93-1.29 |                                              |                  |
| [40,Inf)                                                                       | 82      | 1.09                                                        | 0.94                                                    | 0.72-1.21 |                                              |                  |
| Continuous ( <i>P for trend</i> )                                              |         | <i>0.11</i>                                                 | <i>0.81</i>                                             |           |                                              |                  |
|                                                                                |         |                                                             |                                                         |           | <b>2.57</b>                                  | <b>1.84-3.59</b> |
| <b>Arsenic ((<math>\mu\text{g}/\text{m}^3</math>)*year)</b>                    |         |                                                             |                                                         |           |                                              |                  |
| [0,0.001)                                                                      | 567     | 1.00                                                        | 1.00                                                    |           |                                              |                  |
| [0.001,1)                                                                      | 53      | 1.24                                                        | 1.25                                                    | 0.94-1.66 |                                              |                  |
| [1,Inf)                                                                        | 67      | 1.54                                                        | 1.26                                                    | 0.97-1.64 |                                              |                  |
| Continuous ( <i>P for trend</i> )                                              |         | <i>0.14</i>                                                 | <i>0.96</i>                                             |           |                                              |                  |
|                                                                                |         |                                                             |                                                         |           | <b>2.57</b>                                  | <b>1.84-3.59</b> |
| <b>Cadmium ((<math>\mu\text{g}/\text{m}^3</math>)*year)</b>                    |         |                                                             |                                                         |           |                                              |                  |
| [0,0.001)                                                                      | 299     | 1.00                                                        | 1.00                                                    |           |                                              |                  |
| [0.001,2)                                                                      | 318     | 0.94                                                        | 0.89                                                    | 0.76-1.05 |                                              |                  |
| [2,Inf)                                                                        | 70      | 1.26                                                        | 1.06                                                    | 0.80-1.39 |                                              |                  |
| Continuous ( <i>P for trend</i> )                                              |         | <i>0.21</i>                                                 | <i>0.85</i>                                             |           |                                              |                  |
|                                                                                |         |                                                             |                                                         |           | <b>2.57</b>                                  | <b>1.84-3.59</b> |
| <b>Quartz dust ((mg/m<sup>3</sup>)*year)</b>                                   |         |                                                             |                                                         |           |                                              |                  |
| [0,0.001)                                                                      | 530     | 1.00                                                        | 1.00                                                    |           |                                              |                  |

|                                                              |     |              |             |                  |             |                  |
|--------------------------------------------------------------|-----|--------------|-------------|------------------|-------------|------------------|
| [0.001,1)                                                    | 81  | 1.39         | <b>1.33</b> | <b>1.05-1.68</b> |             |                  |
| [1,Inf)                                                      | 76  | 1.57         | <b>1.29</b> | <b>1.00-1.66</b> |             |                  |
| Continuous ( <i>P for trend</i> )                            |     | <b>0.001</b> | 0.12        |                  |             |                  |
|                                                              |     |              |             |                  | <b>2.49</b> | <b>1.78-3.48</b> |
| Respirable dust ((mg/m <sup>3</sup> )*year)                  |     |              |             |                  |             |                  |
| [0,0.001)                                                    | 140 | 1.00         | 1.00        |                  |             |                  |
| [0.001,40)                                                   | 447 | 1.24         | 1.18        | 0.97-1.44        |             |                  |
| [40,Inf)                                                     | 100 | 1.33         | 1.17        | 0.88-1.54        |             |                  |
| Continuous ( <i>P for trend</i> )                            |     | <b>0.007</b> | 0.22        |                  |             |                  |
|                                                              |     |              |             |                  | <b>2.52</b> | <b>1.80-3.52</b> |
| Gasoline engine exhaust ((mg/m <sup>3</sup> )*year)          |     |              |             |                  |             |                  |
| [0,0.001)                                                    | 479 | 1.00         | 1.00        |                  |             |                  |
| [0.001,100)                                                  | 183 | 1.06         | 1.07        | 0.89-1.27        |             |                  |
| [100,Inf)                                                    | 25  | 0.75         | 0.75        | 0.50-1.13        |             |                  |
| Continuous ( <i>P for trend</i> )                            |     | <b>0.03</b>  | <b>0.05</b> |                  |             |                  |
|                                                              |     |              |             |                  | <b>2.56</b> | <b>1.83-3.56</b> |
| Diesel engine exhaust ((mg/m <sup>3</sup> )*year)            |     |              |             |                  |             |                  |
| [0,0.001)                                                    | 478 | 1.00         | 1.00        |                  |             |                  |
| [0.001,0.5)                                                  | 142 | 1.18         | 1.18        | 0.98-1.43        |             |                  |
| [0.5,Inf)                                                    | 67  | 0.77         | 0.78        | 0.60-1.01        |             |                  |
| Continuous ( <i>P for trend</i> )                            |     | 0.19         | 0.22        |                  |             |                  |
|                                                              |     |              |             |                  | <b>2.56</b> | <b>1.83-3.57</b> |
| Polycyclic aromatic hydrocarbons ((µg/m <sup>3</sup> )*year) |     |              |             |                  |             |                  |
| [0,0.001)                                                    | 339 | 1.00         | 1.00        |                  |             |                  |
| [0.001,20)                                                   | 280 | 0.93         | 0.88        | 0.74-1.04        |             |                  |
| [20,Inf)                                                     | 68  | 1.49         | 1.17        | 0.88-1.55        |             |                  |
| Continuous ( <i>P for trend</i> )                            |     | <b>0.04</b>  | 0.57        |                  |             |                  |
|                                                              |     |              |             |                  | <b>2.55</b> | <b>1.83-3.57</b> |
| Benzo(a)pyrene ((µg/m <sup>3</sup> )*year)                   |     |              |             |                  |             |                  |
| [0,0.001)                                                    | 411 | 1.00         | 1.00        |                  |             |                  |
| [0.001,1)                                                    | 211 | 0.96         | 0.92        | 0.78-1.09        |             |                  |
| [1,Inf)                                                      | 65  | 1.54         | 1.22        | 0.92-1.61        |             |                  |
| Continuous ( <i>P for trend</i> )                            |     | <b>0.004</b> | 0.21        |                  |             |                  |
|                                                              |     |              |             |                  | <b>2.51</b> | <b>1.80-3.51</b> |
